# Supplementary material
Source: PubMed Central journal article supplement (PMC2700901)
Supplement: 0812619106_0812619106SI.pdf [file 0812619106_0812619106SI.pdf]

# Supporting Information

Gerbens-Leenes et al. 10.1073/pnas.0812619106

## SI Methods

**Calculation of the Water Footprint (WF) of Crops.** For the calculation of the WF of crops, this study used the methodology of the WF concept (1). There is an extensive database that includes the WF of almost all crops produced worldwide ( $\text{m}^3/\text{ton}$ ), based on average national meteorological data (2). This study, however, assessed the WFs of crops more specifically by production location. WF calculations were made by adding up daily crop evapotranspiration ( $\text{mm}/\text{day}$ ) over growing periods, thus providing information on crop water requirements. The start of the growing season depends on climatic conditions in the production location and on the individual choices of farmers. For the start of the growing season, this study took the first option for sowing after winter or after a dry season, assuming that growing seasons start when mean monthly maximum temperatures are above  $10^\circ\text{C}$  and when sufficient rain and global radiation is available.

This study calculated crop water requirements in the main producing countries for the 12 crops shown in Table S1 and for jatropha, distinguishing between the green and the blue WF, but excluding the gray WF. Next, the main producing countries, deriving data from the Food and Agriculture Organization (FAO), were selected (3). For jatropha, it considered production in Brazil, Guatemala, Indonesia, and Nicaragua, countries whose data were available (4). Next, agricultural production locations were selected. Information was obtained from the Madison Center for Sustainability and the Global Environment of the University of Wisconsin (5). For these areas, weather stations providing climatic data, that were used as input for the calculations, were selected. Data were drawn from Müller and Hennings (6).

The calculation of crop water requirements ( $\text{mm}/\text{day}$ ) was performed by major production region, by using the calculation model CROPWAT 4.3 (7) based on the FAO Penman–Monteith method, to estimate reference crop evapotranspiration (8) and a crop coefficient that corrects for the difference between actual and reference crops.

Calculations for green and blue WFs ( $\text{m}^3/\text{ton}$ ) were performed by using Hoekstra and Chapagain's method (1). Green water use ( $\text{m}^3/\text{ha}$ ) over the length of the growing period was calculated as the sum of daily volumes of rainwater evapotranspiration. This green water use is equal to the crop water requirement except when effective precipitation is less than the requirement, in which case rainwater evapotranspiration is equal to effective precipitation. Blue water use ( $\text{m}^3/\text{ha}$ ) over the length of the growing period was calculated as the sum of daily volumes of irrigation-water evapotranspiration. This blue water use is equal to the irrigation requirement, if this requirement is actually met, and otherwise to actual effective irrigation. The irrigation requirement is defined as the crop water requirement minus effective precipitation. In doing so, it has been assumed that irrigation requirements are actually met. The green WF of a crop ( $\text{m}^3/\text{ton}$ ) is the total green water use over the length of the growing period ( $\text{m}^3/\text{ha}$ ) divided by the crop yield ( $\text{ton}/\text{ha}$ ). The blue WF ( $\text{m}^3/\text{ton}$ ) is the total blue water use over the length of the growing period ( $\text{m}^3/\text{ha}$ ) divided by the crop yield ( $\text{ton}/\text{ha}$ ). In general, yields show variations over the years. This study, therefore, calculated average yields over 5 production years (1997–2001) by using data from the FAO (3).

**Calculation of the WF of Heat and Electricity from Biomass.** The energy content of biomass is expressed in terms of combustion values. Energy analysis defines the energy content of a substance

as the amount of heat produced during combustion at  $25^\circ\text{C}$  at 1 bar. It distinguishes between the higher heating value (HHV) and the lower heating value (LHV) (9). For the HHV, energy analysis measures the heat content of water that is the product of the combustion process in the liquid form; in the case of LHV, energy analysis measures the heat content of water that is the product of the combustion process in the gaseous form. For the calculation of the WF of heat from biomass, this study has followed the method of Gerbens-Leenes, et al. (10), which calculates the energy yield of a crop [gigajoule (GJ)/ton] by combining data on the heat of combustion of plant components with information on composition, harvest index, and dry-mass fraction of a crop as shown in Tables S4 and S5:

$$E_{\text{heat}}(c) = HI(c) \times DMF_y(c) \times \sum_{i=1}^5 (f_{y,i} \times HHV_i) + (1 - HI(c)) \times DMF_r(c) \times \sum_{i=1}^5 (f_{r,i} \times HHV_i)$$

$E_{\text{heat}}(c)$  is the energy yield of crop  $c$  in the form of heat (GJ/ton),  $HI(c)$  the harvest index of crop  $c$  (g/g),  $DMF_y(c)$  the dry-mass fraction of the crop yield (g/g),  $DMF_r(c)$  the dry-mass fraction in the rest fraction (i.e., in the residue biomass),  $f_{y,i}$  the fraction of component  $i$  in the dry mass of the crop yield (g/g),  $f_{r,i}$  the fraction of component  $i$  in the dry mass of the rest fraction (g/g), and  $HHV_i$  the higher heating value of component  $i$  [kilojoule (kJ)/g].

For the generation of electricity from biomass, industry can use the heat that becomes available from the combustion of total biomass. The energy in the form of electricity from crop  $c$  (GJ/ton) depends on the efficiency with which energy in the form of biomass-heat can be transformed into electricity:

$$E_{\text{electr}}(c) = \eta \times E_{\text{heat}}(c)$$

For the value of the efficiency  $\eta$ , this study applied a value of 59%, based on the maximum efficiency derived from Carnot (11) and the technology of “Biomass fired Integrated Gasifier Combined Cycle” operated at a temperature of 720 K (9, 12).

The WF of heat from a crop  $c$  ( $\text{m}^3/\text{GJ}$ ) was calculated by dividing the WF of the crop ( $\text{m}^3/\text{ton}$ ) by the heat content of the crop (GJ/ton). The WF of biomass electricity from a crop  $c$  ( $\text{m}^3/\text{GJ}$ ) was calculated by dividing the WF of the crop ( $\text{m}^3/\text{ton}$ ) by the electricity output per crop unit (GJ/ton):

$$WF_{\text{heat}}(c) = \frac{WF(c)}{E_{\text{heat}}(c)}; \quad WF_{\text{electr}}(c) = \frac{WF(c)}{E_{\text{electr}}(c)}$$

**Calculation of the WF of First-Generation Biofuels.** Currently, bio-ethanol is produced from sugars that come from sugar cane or sugar beet, or from starch hydrolysed into sugars derived from maize, wheat, or cassava (13). Under anaerobic conditions, sugar naturally ferments into acids and alcohols (mainly ethanol). For thousands of years people have used yeast to hasten fermentation. The main metabolic pathway involved in ethanol fermentation is glycolysis, through which 1 molecule of glucose is metabolized and 2 molecules of pyruvate are produced (14, 15). Under anaerobic conditions, pyruvate is further reduced to ethanol, with the release of  $\text{CO}_2$ . The overall reaction is  $\text{C}_6\text{H}_{12}\text{O}_6 \rightarrow 2 \text{C}_2\text{H}_5\text{OH} + 2 \text{CO}_2$ . Theoretically, the maximum yield of

ethanol is 511 g of ethanol and 489 g of carbon dioxide per kg of glucose metabolized (or 530 g of ethanol per kg of starch). Often, various by-products are also produced, for example, glycerol (15). During ethanol fermentation, yeast cells suffer from stresses, such as ethanol accumulation, inhibiting yeast cell growth and ethanol production. The final ethanol concentration is  $\approx 10\text{--}12\%$  (15, 16). The fermentation industry, therefore, uses a tanks-in-series system to alleviate product inhibition. Currently, it can reach a yield of 90–93% of the theoretical value of glucose to ethanol (17).

Oilseed crops, such as rapeseed, soybean, and jatropha, are used to produce either straight vegetable oil or biodiesel. Straight vegetable oil is oil extracted from an oilseed crop and directly used for energy purposes (13). An example is olive oil for lighting. Because of its chemical properties, such as the high viscosity at low temperatures, it is often difficult to use straight vegetable oil as a biofuel in diesel engines (13). In countries with warm climates, the relatively high temperatures prevent the oil from thickening and straight vegetable oil is a viable fuel. In countries with temperate climates, the oil needs additional treatment to make a biodiesel that is less sensitive to lower temperatures. Biodiesel is manufactured in a chemical reaction termed transesterification, in which oil reacts with an alcohol resulting in an alkyl ester of the fatty acid, with glycerine molecules as the primary coproduct. In Europe, rapeseed oil is the dominant feedstock for biodiesel, with some sunflower oil also used. In the U.S., the main feedstock is soybean oil, and in tropical and subtropical countries, palm, coconut, and jatropha oils are used (13).

When calculating natural resource use, the whole life cycle of a product should be taken into account. The use of water, however, is predominantly during the first link of the production chain—agriculture. Ethanol production, for example, requires  $\approx 21$  L of water per L of ethanol, but this water is often reused (18). This study, therefore, only took water requirements in agriculture into account and ignored water use in the industrial links of the production chain.

The ethanol-energy yield of a crop (in GJ/ton) was calculated as follows:

$$E_{ethanol}(c) = DMF_y(c) f_{carbohydr}(c) f_{ethanol} \times HHV_{ethanol}$$

where  $DMF_y(c)$  is the dry-mass fraction in the crop yield (g/g),  $f_{carbohydr}(c)$  the fraction of carbohydrates in the dry mass of the crop yield (g/g),  $f_{ethanol}$  the amount of ethanol obtained per unit

of carbohydrate (g/g), and  $HHV_{ethanol}$  the higher heating value of ethanol (kJ/g). For the amount of ethanol per unit of sugar, we assumed the theoretical maximum value of 0.51 g/g, and for starch, 0.53 g/g (17).

The biodiesel-energy yield of a crop (in GJ/ton) was calculated as follows:

$$E_{diesel}(c) = DMF_y(c) \times f_{fat}(c) \times f_{diesel} \times HHV_{diesel}$$

where  $DMF_y(c)$  is the dry-mass fraction in the crop yield (g/g),  $f_{fat}(c)$  the fraction of fats in the dry mass of the crop yield (g/g),  $f_{diesel}$  the amount of biodiesel obtained per unit of fat (g/g), and  $HHV_{diesel}$  the higher heating value of biodiesel (kJ/g). For the fraction biodiesel per fat weight, we assumed the value of 1. The fractions of carbohydrates and fats in the dry mass of crop yields are given in Table S5. Table S6 gives the HHVs of ethanol and biodiesel.

The WF of ethanol energy from a crop  $c$  ( $\text{m}^3/\text{GJ}$ ) was calculated by dividing the WF of the crop ( $\text{m}^3/\text{ton}$ ) by the ethanol energy yield of the crop (GJ/ton). The WF of biodiesel energy from a crop  $c$  ( $\text{m}^3/\text{GJ}$ ) was calculated in a similar way:

$$WF_{ethanol}(c) = \frac{WF(c)}{E_{ethanol}(c)}; \quad WF_{diesel}(c) = \frac{WF(c)}{E_{diesel}(c)}$$

For the calculation of the WF of first-generation biofuels, this study fully allocated the WF of the crop to the biofuels derived, assuming that the value of the residues of production was much lower than the value of the biofuel.

**Calculation of the WF of Next-Generation Biofuels.** Biomass not only contains starch, sugar, and oil that can be processed into biofuels, it also contains large amounts of cellulosic matter. Thus far, the cellulosic fraction could be used for energy only by burning it to provide heat and produce electricity. It is expected that these cellulosic fractions will form an attractive source for the production of liquid, next-generation biofuels for which industry can use total biomass, including wastes. It is not yet clear what efficiency will be achieved in converting total biomass into biofuel. It is safe, however, to assume that the WF of next-generation biofuels will never be lower than the WF of the crop ( $\text{m}^3/\text{ton}$ ) divided by the energy content of the crop (GJ/ton), where the latter is expressed in terms of its HHV.

- Hoekstra AY, Chapagain AK (2008) *Globalization of Water. Sharing the Planet's Freshwater Resources* (Blackwell, Oxford, UK).
- Chapagain AK, Hoekstra AY (2004) *Water Footprints of Nations. Value of Water Res Report Series No. 16* (UNESCO-IHE, Delft, The Netherlands).
- Food and Agriculture Organization (2008) FAOSTAT-Agriculture. Available at <http://faostat.fao.org/site/339/default.aspx>. Accessed January 7, 2008.
- Daey Ouwens K, et al. (2000) *Position Paper on Jatropha curcas. State of the Art, Small and Large Scale Project Development. Results of the Seminar held in March 2007.* (Wageningen Univ, The Netherlands).
- Madison Center for Sustainability and the Global Environment, University of Wisconsin (2008) Maps, Data and Models. Available at [www.sage.wisc.edu/download/majorcrops/majorcrops.html](http://www.sage.wisc.edu/download/majorcrops/majorcrops.html). Accessed January 7, 2008.
- Müller MJ, Hennings D (2000) Climate 1, the global climate data atlas. (University of Flensburg, Inst. F. Geografie, Flensburg, Germany).
- Food and Agriculture Organization (2007) *CROPWAT 4.3 Decision Support System.* Available at [www.fao.org/nr/water/infocores.databases.cropwat.html](http://www.fao.org/nr/water/infocores.databases.cropwat.html). Accessed January 3, 2007.
- Allen RG, Pereira LS, Raes D, Smith M (1998) *Crop Evapotranspiration: Guidelines for Computing Crop Water Requirements. FAO Irrigation and Drainage Paper 56.* (Food and Agriculture Organization, Rome, Italy).
- Blok K (2006) *Introduction to energy analysis* (Techné Press, Amsterdam, The Netherlands).
- Gerbens-Leenes PW, Hoekstra AY, van der Meer TH (2009) The water footprint of energy from biomass: A quantitative assessment and consequences of an increasing share of bio-energy supply. *Ecol Econ* 68:1052–1060.
- Carnot S (1824) *Reflections on the Motive Power of Fire* (Bachelier, Paris) (in French).
- Faay APC (1997) Energy from biomass and waste. PhD thesis (University of Utrecht, The Netherlands).
- Worldwatch Institute (2007) *Biofuels for Transport. Global Potential and Implications for Sustainable Energy and Agriculture* (Earthscan, London, UK).
- Verkerk G, et al. (1986) *Binas, Information For Secondary Education in the Natural Sciences* (translated from Dutch), trans Brownie WR (Wolters-Noordhoff, Groningen, The Netherlands), 2nd Ed.
- Bai FW, Anderson WA, Moo-Young M (2008) Ethanol fermentation technologies from sugar and starch feedstocks. *Biotech Adv* 26:89–105.
- Catsberg CME, Kempen-van Dommelen GJM (1997) *The Knowledge of Foods* (Intro, Baarn, The Netherlands) (in Dutch).
- Rosillo-Calle F, De Groot P, Hemstock SL, Woods J (2007) *The Biomass Assessment Handbook. Bioenergy for a Sustainable Environment* (Earthscan, London, UK).
- Institute for Agriculture and Trade Policy (2007) *Biofuels and Global Water Challenges* (Institute for Agriculture and Trade Policy, Minneapolis, MN).
- Food and Agriculture Organization (2007) FAOSTAT-Agriculture. Available at <http://faostat.fao.org/site/339/default.aspx>. Accessed January 12, 2007.
- Goudriaan J, Groot JJR, Uithol PWJ (2001) Productivity of agro-ecosystems. *Terrestrial Global Productivity* (Academic, New York), pp 301–304.
- Penning de Vries FWT, Jansen DM, ten Berge HFM, Bakema A (1989) *Simulation of Ecophysiological Processes of Growth in Several Annual Crops* (Pudoc, Wageningen, The Netherlands), pp 63–64.
- Habekotté B (1997) Identification of strong and weak yield determining components of winter oilseed rape compared with winter wheat. *Eur J Agron* 7:315–321.
- Akhtar N (2004) Agro-physiological response of spring sown sunflower (*Helianthus Annuus L.*) to various management practices. PhD thesis. (University of Agriculture, Faisalabad, Pakistan).
- Nonhebel S (2002) Energy use efficiency in biomass production systems. *Economics of Sustainable Energy in Agriculture*, eds van Ierland EC, Oude Lansink A. (Kluwer, The Netherlands), pp 75–85.

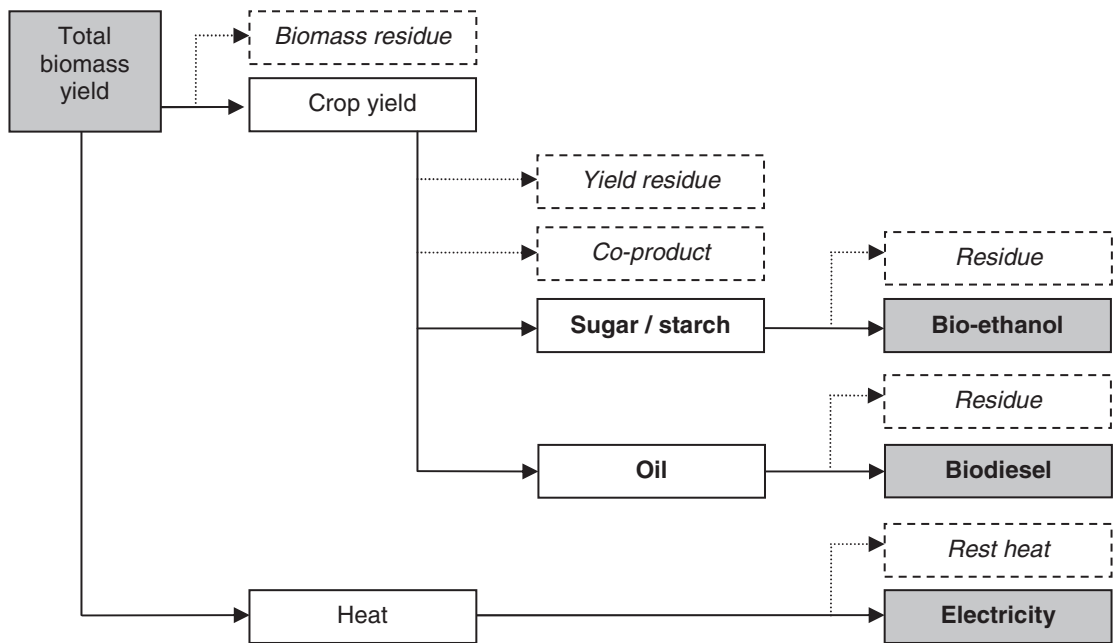

**Fig. S1.** From biomass to bioenergy. Total biomass yield can be converted into heat and subsequently into electricity. Alternatively, the crop yield, which is part of the total biomass, can be converted into bioethanol (in the case of starch and sugar crops) or biodiesel (in the case of oil crops). In every step in the production chain, residues or rest heat are generated.

**Table S1. The 12 crops that contribute 80% of total global crop production**

| Crop                                | Average global production<br>for 1997–2001, 10 <sup>6</sup> ton/yr |
|-------------------------------------|--------------------------------------------------------------------|
| Sugar cane                          | 1,258                                                              |
| Maize                               | 603                                                                |
| Wheat                               | 594                                                                |
| Paddy rice                          | 593                                                                |
| Potato                              | 309                                                                |
| Sugar beet                          | 253                                                                |
| Rye                                 | 220                                                                |
| Cassava                             | 172                                                                |
| Soybean                             | 160                                                                |
| Barley                              | 140                                                                |
| Sorghum                             | 59                                                                 |
| Rapeseed                            | 38                                                                 |
| Total                               | 4,401                                                              |
| Total global crop production (1997) | 5,513                                                              |

See ref. 19.

**Table S2. Overview of the extreme values of total WFs and blue WFs per crop, m<sup>3</sup>/ton**

| Crop       | Country       | Extreme values                |                              |
|------------|---------------|-------------------------------|------------------------------|
|            |               | total WF, m <sup>3</sup> /ton | blue WF, m <sup>3</sup> /ton |
| Barley     | Ireland       | 448                           | 147                          |
|            | Kazakhstan    | 6,540                         | 6,510                        |
| Cassava    | India         | 191                           | 0                            |
|            | Côte d'Ivoire | 1,437                         | 1,437                        |
| Jatropha   | Brazil        | 3,222                         | 1,170                        |
|            | India         | 21,729                        | 14,344                       |
| Maize      | Spain         | 407                           | 0                            |
|            | Nigeria       | 3,783                         | 2,267                        |
| Rapeseed   | Germany       | 1,482                         | 0                            |
|            | India         | 9,900                         | 4,130                        |
| Paddy rice | Egypt         | 634                           | 19                           |
|            | Nigeria       | 6,471                         | 4,629                        |
| Potato     | Spain         | 85                            | 0                            |
|            | Kazakhstan    | 922                           | 922                          |
| Rye        | Sweden        | 637                           | 245                          |
|            | Russia        | 2,620                         | 1,220                        |
| Sorghum    | Egypt         | 525                           | 0                            |
|            | Niger         | 24,700                        | 14,117                       |
| Soybean    | Italy         | 1,442                         | 546                          |
|            | India         | 7,540                         | 2,583                        |
| Sugar beet | Morocco       | 56                            | 0                            |
|            | Russia        | 455                           | 376                          |
| Sugar cane | Peru          | 108                           | 8                            |
|            | Cuba          | 524                           | 217                          |
| Wheat      | Denmark       | 513                           | 0                            |
|            | Kazakhstan    | 10,178                        | 9,989                        |

**Table S3. Energy provided by ethanol from 2 sugar and 10 starch crops that were included in this study, as well as the energy provided by oil from the 3 oil crops**

| Crop                | Megajoule of biofuel per<br>kg of fresh weight crop |
|---------------------|-----------------------------------------------------|
| Ethanol from sugar  |                                                     |
| Sugar cane          | 2.3                                                 |
| Sugar beet          | 2.6                                                 |
| Ethanol from starch |                                                     |
| Potato              | 3.1                                                 |
| Cassava             | 5.2                                                 |
| Sorghum             | 10.0                                                |
| Maize               | 10.0                                                |
| Wheat               | 10.2                                                |
| Barley              | 10.2                                                |
| Paddy rice          | 10.5                                                |
| Rye                 | 10.5                                                |
| Biodiesel from oil  |                                                     |
| Soybean             | 6.4                                                 |
| Rapeseed            | 11.7                                                |
| Jatropha            | 12.8                                                |

**Table S4. HHV for 6 major groups of plant components**

| Plant component     | HHV, kJ/g |
|---------------------|-----------|
| Carbohydrates       | 17.3      |
| Proteins            | 22.7      |
| Fats                | 37.7      |
| Lignins             | 29.9      |
| Organic acids       | 13.9      |
| Minerals (K,Ca,P,S) | 0.0       |

See ref. 9.

**Table S5. Main characteristics for 12 crops**

|                       | Cassava            | Barley                   | Maize                   | Paddy rice     | Potato             | Rapeseed                   | Rye                      | Sorghum                  | Soybean            | Sugar cane              | Sugar beet        | Wheat                    |
|-----------------------|--------------------|--------------------------|-------------------------|----------------|--------------------|----------------------------|--------------------------|--------------------------|--------------------|-------------------------|-------------------|--------------------------|
| Harvest index         | 0.70 <sup>a</sup>  | 0.42 <sup>a</sup>        | 0.45 <sup>a</sup>       | 0.42           | 0.70 <sup>a</sup>  | 0.32 <sup>a</sup>          | 0.42                     | 0.42                     | 0.40 <sup>a</sup>  | 0.60 <sup>a</sup>       | 0.66 <sup>a</sup> | 0.42 <sup>a</sup>        |
| Economic yield        | tuber <sup>b</sup> | ear + grain <sup>b</sup> | whole tops <sup>b</sup> | inflor + grain | tuber <sup>b</sup> | inflor + seed <sup>d</sup> | ear + grain <sup>b</sup> | ear + grain <sup>b</sup> | beans <sup>a</sup> | whole tops <sup>a</sup> | beet <sup>a</sup> | ear + grain <sup>b</sup> |
| Dry mass <sup>b</sup> | 0.38               | 0.85                     | 0.85                    | 0.85           | 0.25               | 0.74                       | 0.85                     | 0.85                     | 0.92               | 0.27                    | 0.21              | 0.85                     |
| Composition           |                    |                          |                         |                |                    |                            |                          |                          |                    |                         |                   |                          |
| dry mass,             |                    |                          |                         |                |                    |                            |                          |                          |                    |                         |                   |                          |
| g/100 g <sup>c</sup>  |                    |                          |                         |                |                    |                            |                          |                          |                    |                         |                   |                          |
| Carbohydrates         | 87                 | 76                       | 75                      | 76             | 78                 | 7                          | 76                       | 76                       | 29                 | 57                      | 82                | 76                       |
| Proteins              | 3                  | 12                       | 8                       | 8              | 9                  | 22                         | 12                       | 12                       | 37                 | 7                       | 5                 | 12                       |
| Fats                  | 1                  | 2                        | 4                       | 2              | 0                  | 42                         | 2                        | 2                        | 18                 | 2                       | 0                 | 2                        |
| Lignins               | 3                  | 6                        | 11                      | 12             | 3                  | 2                          | 6                        | 6                        | 6                  | 22                      | 5                 | 6                        |
| Organic acids         | 3                  | 2                        | 1                       | 1              | 5                  | 1                          | 2                        | 2                        | 5                  | 6                       | 4                 | 2                        |
| Minerals              | 3                  | 2                        | 1                       | 1              | 5                  | 26                         | 2                        | 2                        | 5                  | 6                       | 4                 | 2                        |
| (K, Ca, P, S)         |                    |                          |                         |                |                    |                            |                          |                          |                    |                         |                   |                          |
| Rest fraction         | leaves             | shells                   | stems                   | stems          | leaves             | leaves                     | stems                    | stems                    | leaves             | stems                   | leaves            | stems                    |
| Dry mass <sup>b</sup> | 0.38               | 0.85                     | 0.85                    | 0.85           | 0.13               | 0.13                       | 0.85                     | 0.85                     | 0.15               | 0.27                    | 0.21              | 0.85                     |
| Composition           |                    |                          |                         |                |                    |                            |                          |                          |                    |                         |                   |                          |
| dry mass,             |                    |                          |                         |                |                    |                            |                          |                          |                    |                         |                   |                          |
| g/100 g <sup>c</sup>  |                    |                          |                         |                |                    |                            |                          |                          |                    |                         |                   |                          |
| Carbohydrates         | 52                 | 62                       | 62                      | 62             | 52                 | 52                         | 62                       | 62                       | 52                 | 62                      | 52                | 62                       |
| Proteins              | 25                 | 10                       | 10                      | 10             | 25                 | 25                         | 10                       | 10                       | 25                 | 10                      | 25                | 10                       |
| Fats                  | 5                  | 2                        | 2                       | 2              | 5                  | 5                          | 2                        | 2                        | 5                  | 2                       | 5                 | 2                        |
| Lignins               | 5                  | 20                       | 20                      | 20             | 5                  | 5                          | 20                       | 20                       | 5                  | 20                      | 5                 | 20                       |
| Organic acids         | 5                  | 2                        | 2                       | 2              | 5                  | 5                          | 2                        | 2                        | 5                  | 2                       | 5                 | 2                        |
| Minerals              | 8                  | 4                        | 4                       | 4              | 8                  | 8                          | 4                        | 4                        | 8                  | 4                       | 8                 | 4                        |
| (K, Ca, P, S)         |                    |                          |                         |                |                    |                            |                          |                          |                    |                         |                   |                          |

<sup>a</sup>See ref. 20; <sup>b</sup>See ref. 21; <sup>c</sup>see ref. 22; <sup>d</sup>see ref. 23; <sup>e</sup>Assumption; <sup>f</sup>see ref. 24.



**Table S6. HHV of ethanol and biodiesel**

|           | HHV, kJ/g |
|-----------|-----------|
| Biodiesel | 37.7      |
| Ethanol   | 29.7      |

See refs. 12 and 14.
